# Supplementary material for: Assessment of piRNA biogenesis and function in testicular germ cell tumors and their precursor germ cell neoplasia in situ
Source: BMC Cancer. 2018 Jan 4;18:20. doi: 10.1186/s12885-017-3945-6 (PMC5755174; doi:10.1186/s12885-017-3945-6)
Supplement: Supplementary file 1 — (XLSX 101 kb) [file 12885_2017_3945_MOESM1_ESM.xlsx]

## Sheet: S1.Expression correlation(norm)
	DDX4	DAZL	PIWIL1	PIWIL2	PLD6	HENMT1	MOV10L1	TDRD1	MYBL1	TDRD5	TDRD6	TDRD9	TDRD12	RNF17	TDRKH	MAEL
DDX4	1	0.973498	0.962335	0.956201	0.981719	0.988463	0.936913	0.938903	0.974653	0.976254	0.943983	0.927338	0.987112	0.961891	0.914515	0.909645
DAZL	0.973498	1	0.967869	0.965263	0.947203	0.974257	0.88139	0.94576	0.980533	0.945223	0.906804	0.957028	0.958539	0.960242	0.864142	0.902983
PIWIL1	0.962335	0.967869	1	0.9469	0.955866	0.973997	0.921168	0.964136	0.980306	0.955124	0.92951	0.928366	0.956185	0.957022	0.896496	0.92101
PIWIL2	0.956201	0.965263	0.9469	1	0.946252	0.968024	0.865663	0.957407	0.959576	0.929222	0.881404	0.965284	0.955662	0.967162	0.842929	0.867109
PLD6	0.981719	0.947203	0.955866	0.946252	1	0.982584	0.956382	0.937969	0.962336	0.976855	0.951141	0.904862	0.984911	0.954531	0.933158	0.90275
HENMT1	0.988463	0.974257	0.973997	0.968024	0.982584	1	0.941088	0.950629	0.981563	0.980813	0.939251	0.937865	0.986098	0.960593	0.918163	0.907058
MOV10L1	0.936913	0.88139	0.921168	0.865663	0.956382	0.941088	1	0.884445	0.912279	0.953259	0.951237	0.807579	0.942266	0.879708	0.955965	0.900953
TDRD1	0.938903	0.94576	0.964136	0.957407	0.937969	0.950629	0.884445	1	0.948572	0.926543	0.900729	0.92328	0.942574	0.962736	0.862325	0.884526
MYBL1	0.974653	0.980533	0.980306	0.959576	0.962336	0.981563	0.912279	0.948572	1	0.965541	0.934176	0.940465	0.964369	0.956432	0.888711	0.913945
TDRD5	0.976254	0.945223	0.955124	0.929222	0.976855	0.980813	0.953259	0.926543	0.965541	1	0.956619	0.885996	0.97099	0.933119	0.933571	0.899422
TDRD6	0.943983	0.906804	0.92951	0.881404	0.951141	0.939251	0.951237	0.900729	0.934176	0.956619	1	0.835563	0.933656	0.897422	0.921935	0.93195
TDRD9	0.927338	0.957028	0.928366	0.965284	0.904862	0.937865	0.807579	0.92328	0.940465	0.885996	0.835563	1	0.924795	0.950756	0.803167	0.827597
TDRD12	0.987112	0.958539	0.956185	0.955662	0.984911	0.986098	0.942266	0.942574	0.964369	0.97099	0.933656	0.924795	1	0.962793	0.916255	0.895097
RNF17	0.961891	0.960242	0.957022	0.967162	0.954531	0.960593	0.879708	0.962736	0.956432	0.933119	0.897422	0.950756	0.962793	1	0.87131	0.882985
TDRKH	0.914515	0.864142	0.896496	0.842929	0.933158	0.918163	0.955965	0.862325	0.888711	0.933571	0.921935	0.803167	0.916255	0.87131	1	0.899695
MAEL	0.909645	0.902983	0.92101	0.867109	0.90275	0.907058	0.900953	0.884526	0.913945	0.899422	0.93195	0.827597	0.895097	0.882985	0.899695	1
Color scale	-1
	0
	1
Supplementary table S1. Pearson’s r for expression level of 14 piRNA-pathway genes as well as two germline markers (DDX4 and DAZL) in healthy testis tissues from 176 individuals (172 GTEX samples + 4 healthy testis tissue samples)

## Sheet: S2.Expression correlation GCNIS
	NANOG	POU5F1	DDX4	DAZL	PIWIL1	PIWIL2	PIWIL4	HENMT1	MAEL	MOV10L1	MYBL1	PLD6	RNF17	TDRD1	TDRD12	TDRD5	TDRD6	TDRD9	TDRDKH
NANOG	1	0.166559	-0.286683	-0.19283	-0.265088	-0.299796	-0.32751	-0.227693	-0.254522	-0.28879	-0.252798	-0.298839	-0.214332	-0.294734	0.113605	-0.265869	-0.250407	-0.289606	-0.166076
POU5F1	0.166559	1	-0.247408	-0.241937	-0.238716	-0.287957	-0.295548	-0.232286	-0.233507	-0.249368	-0.244415	-0.268348	-0.237584	-0.249922	-0.115126	-0.225126	-0.232986	-0.233406	-0.259605
DDX4	-0.286683	-0.247408	1	0.972292	0.980047	0.958151	0.876179	0.950038	0.964665	0.992412	0.967282	0.987352	0.987058	0.989475	0.843363	0.971389	0.965632	0.984538	0.940547
DAZL	-0.19283	-0.241937	0.972292	1	0.973981	0.945493	0.844613	0.937409	0.984488	0.972695	0.948259	0.979253	0.977158	0.951895	0.906598	0.947445	0.971373	0.943504	0.950526
PIWIL1	-0.265088	-0.238716	0.980047	0.973981	1	0.930298	0.884916	0.961892	0.982589	0.976632	0.98377	0.971695	0.986766	0.97166	0.863924	0.983622	0.991306	0.944551	0.957761
PIWIL2	-0.299796	-0.287957	0.958151	0.945493	0.930298	1	0.900902	0.949823	0.941642	0.945311	0.907247	0.979732	0.936014	0.961902	0.807167	0.93852	0.929075	0.941832	0.933254
PIWIL4	-0.32751	-0.295548	0.876179	0.844613	0.884916	0.900902	1	0.953095	0.86934	0.850947	0.897475	0.875004	0.890519	0.926001	0.718919	0.935587	0.899834	0.85651	0.915477
HENMT1	-0.227693	-0.232286	0.950038	0.937409	0.961892	0.949823	0.953095	1	0.958622	0.935971	0.955895	0.949285	0.960322	0.976808	0.84582	0.988695	0.975475	0.925986	0.977024
MAEL	-0.254522	-0.233507	0.964665	0.984488	0.982589	0.941642	0.86934	0.958622	1	0.964921	0.962037	0.975685	0.966513	0.956089	0.8784	0.965553	0.99158	0.928487	0.952336
MOV10L1	-0.28879	-0.249368	0.992412	0.972695	0.976632	0.945311	0.850947	0.935971	0.964921	1	0.952294	0.984951	0.973218	0.976139	0.846413	0.954267	0.959506	0.987762	0.933006
MYBL1	-0.252798	-0.244415	0.967282	0.948259	0.98377	0.907247	0.897475	0.955895	0.962037	0.952294	1	0.952517	0.978817	0.967994	0.855732	0.983633	0.981834	0.925317	0.953112
PLD6	-0.298839	-0.268348	0.987352	0.979253	0.971695	0.979732	0.875004	0.949285	0.975685	0.984951	0.952517	1	0.967851	0.974971	0.844509	0.957225	0.96456	0.968035	0.948714
RNF17	-0.214332	-0.237584	0.987058	0.977158	0.986766	0.936014	0.890519	0.960322	0.966513	0.973218	0.978817	0.967851	1	0.981293	0.879396	0.982062	0.977427	0.957652	0.959371
TDRD1	-0.294734	-0.249922	0.989475	0.951895	0.97166	0.961902	0.926001	0.976808	0.956089	0.976139	0.967994	0.974971	0.981293	1	0.8309	0.986624	0.967043	0.978154	0.955205
TDRD12	0.113605	-0.115126	0.843363	0.906598	0.863924	0.807167	0.718919	0.84582	0.8784	0.846413	0.855732	0.844509	0.879396	0.8309	1	0.847187	0.871292	0.812265	0.886618
TDRD5	-0.265869	-0.225126	0.971389	0.947445	0.983622	0.93852	0.935587	0.988695	0.965553	0.954267	0.983633	0.957225	0.982062	0.986624	0.847187	1	0.98598	0.939148	0.968072
TDRD6	-0.250407	-0.232986	0.965632	0.971373	0.991306	0.929075	0.899834	0.975475	0.99158	0.959506	0.981834	0.96456	0.977427	0.967043	0.871292	0.98598	1	0.92574	0.966408
TDRD9	-0.289606	-0.233406	0.984538	0.943504	0.944551	0.941832	0.85651	0.925986	0.928487	0.987762	0.925317	0.968035	0.957652	0.978154	0.812265	0.939148	0.92574	1	0.914945
TDRDKH	-0.166076	-0.259605	0.940547	0.950526	0.957761	0.933254	0.915477	0.977024	0.952336	0.933006	0.953112	0.948714	0.959371	0.955205	0.886618	0.968072	0.966408	0.914945	1
Color scale	-1
	0
	1
Supplementary table S2. Pearson’s r for expression level of 14 piRNA-pathway genes as well as two GCNIS markers (NANOG and POU5F1) and two germline markers (DDX4 and DAZL) in testis tissues adjacent to TGCTs from 21 patients

## Sheet: S2F.Correlation,11 smallRNAseqs
Pearson's r		A1	A2	A3	A4	A5	A6	AO1	AO2	AO3	AO4	AO5
smallRNA-seq	A1	1	0.97919	0.962051	0.91781	0.969751	0.858088	0.976953	0.981067	0.972645	0.887845	0.980433
	A2	0.97919	1	0.956078	0.902299	0.9596	0.850237	0.956268	0.947019	0.980671	0.879495	0.976237
	A3	0.962051	0.956078	1	0.944858	0.972176	0.905809	0.915515	0.921789	0.939839	0.855743	0.958348
	A4	0.91781	0.902299	0.944858	1	0.926962	0.964681	0.863772	0.869999	0.863537	0.813209	0.899699
	A5	0.969751	0.9596	0.972176	0.926962	1	0.857593	0.942891	0.9465	0.95241	0.857794	0.960201
	A6	0.858088	0.850237	0.905809	0.964681	0.857593	1	0.789509	0.798723	0.803796	0.774679	0.84971
	AO1	0.976953	0.956268	0.915515	0.863772	0.942891	0.789509	1	0.987478	0.957784	0.862542	0.965785
	AO2	0.981067	0.947019	0.921789	0.869999	0.9465	0.798723	0.987478	1	0.955025	0.865746	0.964689
	AO3	0.972645	0.980671	0.939839	0.863537	0.95241	0.803796	0.957784	0.955025	1	0.89646	0.988531
	AO4	0.887845	0.879495	0.855743	0.813209	0.857794	0.774679	0.862542	0.865746	0.89646	1	0.899754
	AO5	0.980433	0.976237	0.958348	0.899699	0.960201	0.84971	0.965785	0.964689	0.988531	0.899754	1
RNA-seq	Adult testis, SRR2156557	0.723068	0.714735	0.749373	0.817627	0.725414	0.873012	0.650776	0.670786	0.694444	0.66636	0.72245
	Adult testis, SRR3647473	0.639143	0.623855	0.663761	0.739349	0.643539	0.801113	0.568464	0.589013	0.610196	0.582133	0.634083
	Juvenile testis, SRR2040581	0.667595	0.64979	0.689098	0.75435	0.670776	0.812851	0.595564	0.617955	0.635035	0.602249	0.656778
Color scale	-1
	0
	1
Supplementary table S2F. Pearson’s r for transposable element RPMs in 11 postnatal small RNA libraries and 3 postnatal testis RNA-seq libraries.

## Sheet: S3. 1U bias for all libraries
PLUS strand	TE subfamily name	N1	N2	N3	GCNIS NS1	GCNIS NS2	GCNIS NS3	GCNIS SE1	GCNIS SE2	GCNIS SE3	NS1	NS2	NS3	SE1	SE2	SE3	Fetal brain	Fetal heart	Adult brain	Genome	Supplementary table S3. 1U bias for top piRNA-producing TEs. Boxes marked green if 1U fraction is at least 5% higher than the genome control.
	AluJb	32.9973	53.816	46.124	48.883	46.6011	57.6338	26.506	13.5266	25.1701	15.6455	13.9759	14.1975	15.9555	10.1562	18.3051	12.1212	33.3333	12.1951	19.8756
	AluJo	24.1656	48.6131	41.2451	40.9836	33.935	27.7229	18.8925	11.7077	15.7143	14.6966	10.3267	11.802	13.1694	11.3208	11.9403	12.8205	20	14.3791	20.3426
	AluJr	22.6647	42.4269	39.8268	38.4242	31.7836	24.5922	16.6867	11.7192	15.5224	14.5035	10.1842	11.8331	12.6927	11.3924	11.0335	14.2857	20	14.6667	20.9552
	AluSp	39.8214	60.0318	50.8021	58.4988	58.0547	68.4025	36.8421	14.2212	30.0448	17.6812	20.2586	16.0784	14.7967	11.0092	16.2921	11.5385	14.2857	16.8224	17.9331
	AluSx	37.7322	55.1987	46.4819	55.8513	55.0856	64.2735	33.908	14.7208	30	17.4455	16.6667	14.9655	15.2971	14.0845	16.087	14.2857	25	13.2812	18.5823
	AluSx1	38.7387	55.4399	46.3983	58.5353	55.2538	64.3824	34.5366	14.9485	30.0752	20.9366	16.696	14.651	16.3662	15.5039	16.1572	14.2857	25	13.7097	18.5247
	AluSz	38.5799	55.6775	46.2527	55.8402	55.5196	64.4326	33.8418	14.5051	30.5019	17.6006	16.4049	15.1978	15.2478	13.0719	16.4147	14.7059	25	14.1732	19.1583
	AluY	36.0353	52.1239	42.7711	52.4514	49.2777	58.5088	28.343	15.6398	25.4237	19.5092	14.7196	15.1182	17.1963	15.3846	15.0171	17.6471	40	12.037	16.2568
	HERVH	60.1078	60.0182	61.9048	65.034	56.9697	59.8671	60.5634	31.746	32.2034	31.2865	23.2143	22.0472	20.6186	0.995025	22.7273	9.09091	66.6667	7.69231	28.903
	HERVK9	59.8071	67.9196	65.7303	72.1805	66.9456	69.0663	46.6667	6.66667	31.746	56.8627	10.7143	17.1717	31.0345	3.27022	18.9189	50	83.871	36.1111	27.3277
	HERVL	58.5714	67.8888	61.8234	67.1652	62.5743	65.289	49.6599	28	43.3735	41.8868	36.3636	17.1875	11.5385	20	27.6923	57.1429	33.3333	22.5806	27.1124
	HUERS-P2	45.2381	47.9592	57.6923	56.9892	62.5	54.0541	40.9091	33.3333	21.4286	12.2449	27.7778	46.0674	6.66667	20	26.9231	0	0	44.4444	25.9778
	L1Hs	50.8972	57.0658	49.6959	57.1513	52.8521	54.2659	39.346	21.179	39.4366	36.6739	22.1003	12.8645	19.2	5.16432	17.7474	8.33333	58.3333	10.4839	19.5731
	L1M1	54.386	59.2068	61.7647	57.0957	52.4752	57.7107	40.9091	30.7692	38.8889	29.8507	18.5185	12	20	0	17.3913	33.3333	28.5714	17.6471	22.6581
	L1MC4	68.1818	30.9127	23.3766	75	32.6087	55.3571	93.3333	100	54.5455	42.4242	44.4444	12.8205	45.4545	50	30	50	0	66.6667	26.9405
	L1ME3A	51.3514	64.433	69.8413	61.2245	70.8333	69.697	28.5714	0	33.3333	20	9.09091	26.3158	23.0769	0	0	0	0	16.6667	27.8423
	L1PB1	43.9614	49.0279	40.1869	44.3396	46.2121	51.7059	47.0588	43.75	32.2581	40.6977	36.3636	18.5185	15.0943	13.3333	20	0	25	0	21.2246
	L2	64.2105	80.5425	87.5	89.6774	52.9412	89.5787	69.8413	40	60	54.7619	19.5122	33.0827	71.4286	50	40	50	100	77.5862	34.0459
	LTR1	40.4255	49.8944	54.7945	53.0351	39.3617	61.6573	56.5217	0	20	57.1429	11.1111	20.8333	0	0	50	0	0	50	19.2778
	LTR10C	64.8649	58.7635	56.4706	48.4163	46.0674	59.5679	50	0	0	44.4444	50	33.3333	33.3333	0	0	0	0	66.6667	32.2374
	LTR12C	58.9722	67.0501	65.4485	63.4733	58.8599	63.8564	56.4885	15.1515	55.9524	47.6821	20	17.0068	25	10	22.8571	0	50	31.25	20.5222
	LTR1A2	7.06402	44.1846	46.5116	5.56083	18.9716	13.6995	7.48031	0	5.88235	18.3673	16.6667	2.08333	16.6667	0	0	0	0	46.1538	18.7731
	MER4E	65.2632	47.6026	42.3313	55.5752	54.7297	54.4543	54	100	33.3333	40	20	33.3333	40	66.6667	62.5	0	0	40	31.58
	MIR	55.3191	47.2628	68.1818	61.7284	45.8333	70.4545	36.8421	11.1111	9.09091	18.75	10.7143	18.1818	11.1111	0	5.88235	0	0	18.75	31.1371
	MIR3	61.1111	26.7206	57.1429	38.0952	2.98103	50	45.4545	0	0	5.26316	1.35135	0.0513347	14.2857	0	0	12.5	0	4.34783	30.8184
	MIRb	9.65517	30.2663	61.2245	21.2871	12.7551	50.2762	15.6863	6.45161	0.8	1.3369	2.31214	1.11607	2.77778	0	0.847458	0	0	0.628931	29.922
	MIRc	2.39411	9.93417	12.6984	4.48505	0.976086	1.84494	4.60526	0.075188	0.0743771	0.351288	0.18315	0.509165	0.127065	0	0.167224	4	0	0.46729	30.3169
	MLT1A0	35	47.2062	55.1724	48.5549	45.2381	47.9167	25.7143	0	66.6667	22.7273	26.6667	22.2222	38.4615	0	57.1429	0	0	60	27.7894
	MLT1C	50	53.3965	73.3333	45.4545	48.5714	51.7391	30.7692	0	41.6667	46.1538	31.25	55.2632	25	0	33.3333	0	0	0	24.5957
	MLT1K	22.2222	38.3562	0	50	60	16.6667	100	0	50	33.3333	33.3333	14.2857	0	0	50	0	0	20	27.9507
	MSTA	45.0644	51.2272	46.4789	48.2853	43.6364	45.6731	45.5696	5.26316	47.2222	43.75	28.5714	28.5714	50	50	29.4118	0	0	0	32.1602
	SVA_A	55.1445	53.9861	45.5544	67.7797	53.2556	64.1039	51.272	22.0472	37.6812	37.1917	25.5435	18.1081	17.4447	17.3913	21.1321	14.2857	66.6667	32.7586	22.484
	SVA_B	57.1885	50.58	41.7609	66.7112	56.9716	69.139	50.7962	17.0213	43.6937	38.0789	27.6316	18.7894	19.7753	18.75	20.4461	50	100	35.1351	21.6411
	SVA_C	58.653	52.5388	43.4039	68.7128	60.2331	70.2808	52.7559	17.9856	46.1538	38.9365	28.5714	18.2973	20.045	17.3077	21.3523	50	100	33.3333	21.0075
	SVA_D	59.15	56.1375	47.9583	69.4824	57.0849	66.8282	53.7829	20.979	43.5685	39.9306	27.551	16.1842	18.9376	17.6471	20.7018	16.6667	100	31.25	19.4354
	SVA_E	60.5973	56.379	46.8262	71.5297	59.5174	70.0945	54.5781	20.6349	42.9268	40.619	27.8947	17.1598	19	16	21.5909	16.6667	100	33.871	19.2387
	SVA_F	57.6037	54.8818	46.0967	67.7659	56.4842	64.9942	50.7067	18.543	43.1111	39.1459	29.6875	15.3129	18.6321	11.7647	21.5827	16.6667	100	28.125	16.8701
	THE1D	49.7835	51.5571	46.1039	53.3662	37.963	44.4873	52.381	9.09091	30.4348	47.7273	25.9259	34.6154	20	20	23.0769	0	0	16.6667	32.6393
MINUS strand	TE subfamily name	N1	N2	N3	GCNIS NS1	GCNIS NS2	GCNIS NS3	GCNIS SE1	GCNIS SE2	GCNIS SE3	NS1	NS2	NS3	SE1	SE2	SE3	Fetal brain	Fetal heart	Adult brain	Genome
	AluJb	27.4756	59.2149	64.8276	44.123	50.9158	59.3884	28.3804	22.029	33.9483	18.1752	22.619	25.235	23.0769	20.339	27.7916	34.2105	50	38.2166	29.4897
	AluJo	25.5626	52.6606	55.6364	41.201	49.2934	58.7018	27.5311	20.5387	34.6614	17.2414	21.5842	23.7724	21.7337	21.8182	29.3478	33.3333	50	35.461	29.721
	AluJr	25.9327	53.3156	56.7797	41.7635	50.4754	60.0699	28.3019	19.6364	33.9623	18.2106	21.2551	25.641	20.154	22.3077	28.4457	34.375	33.3333	34.7518	29.6276
	AluSp	31.5229	66.2727	71.8693	53.8644	58.6004	68.5532	32.7649	22.1932	36.5325	22.1323	25.5217	27.2438	24.847	24.3902	29.9043	28	0	34.3066	30.275
	AluSx	34.4209	68.9839	71.671	59.7727	59.237	70.5507	35.3846	24.2975	35.4167	25.6021	23.5763	27.7048	26.1194	22.5989	30.6914	25	25	39.0863	29.7639
	AluSx1	34.2712	68.7879	71.708	59.7247	59.1421	70.4977	35.067	23.84	35.3211	25.4489	23.2662	27.3989	25.6983	22.4719	30.7566	25.7143	25	38.8889	29.6875
	AluSz	33.3333	68.5764	71.7105	59.188	58.0966	69.3111	34.9876	23.9203	35.1163	24.9734	24.0135	27.7674	26.2593	22.093	30.6397	27.027	25	38.1443	29.7629
	AluY	31.5048	66.6531	71.7532	53.8108	59.291	65.416	32.9312	21.393	39.1635	22.3377	24.1491	26.6049	23.6791	21.0526	27.2506	25	50	36.6864	29.485
	HERVH	74.7594	66.4697	69.1765	81.5469	74.8097	77.2995	75.2443	45.9459	63.0252	59.6694	43.2836	35	40.1575	3.07692	35.3448	15	29.1667	29.064	24.3168
	HERVK9	58.2996	71.792	69.0058	75.6385	70.122	75.3521	53.1915	0	60.6061	64.8649	27.2727	21.7949	15.3846	22.2222	13.0435	0	0	23.913	31.8241
	HERVL	63.9485	69.0722	63.9344	69.9399	67.3877	72.2349	68.9189	31.8182	57.4074	53.2374	20	38.2353	30.5556	0	20	0	0	76.9231	28.5334
	HUERS-P2	33.1066	68.0361	79.5775	61.5474	58.2792	72.1699	16.9811	11.0063	29.2208	12.2951	18.1818	8.66873	12.0344	25	11.9048	9.52381	0	14.2857	27.4616
	L1Hs	63.4379	70.7807	66.5978	73.276	70.5754	76.5525	57.3072	35.4515	56.25	50.4888	34.902	31.4063	37.0236	31.4961	46.2185	47.3684	50	37.1429	38.7394
	L1M1	59.0361	71.1435	53.3333	75.7246	55.8974	74.1284	61.9048	30	33.3333	48.5294	47.3684	27.7778	46.6667	11.1111	54.1667	25	100	42.1053	39.6501
	L1MC4	25	71.0526	57.1429	52.1739	41.1765	90.625	50	25	26.087	50	30	16	33.3333	25	57.1429	100	0	15.7895	39.1477
	L1ME3A	50.5882	65.1992	60	83.6066	93.1217	90	68.75	97.3684	77.7778	88.4956	96.1039	88.2353	55.5556	25	70.9302	66.6667	0	38.4615	38.8443
	L1PB1	77.7778	89.2029	91.9598	93.3413	90.1554	96.566	71.7241	68.75	60.5263	76.1364	45.8333	33.3333	31.0345	17.2414	63.6364	66.6667	33.3333	26.6667	40.9304
	L2	24.1935	54.7153	46.6667	57.3529	41.1765	52.8302	35	12.5	34.7826	23.4043	25	4.83871	4.7619	5.55556	11.9048	55.5556	33.3333	89.0411	24.2073
	LTR1	53.1876	62.0523	57.5479	53.4186	50.9346	51.7928	47.5059	0	36.8421	9.13242	12.1951	20	2.7027	0	0.892857	0	0	16.6667	26.1085
	LTR10C	90.9427	80.8238	85.0214	95.4173	89.0647	94.7451	96.1456	0	87.5	88.5714	80	55.5556	40	0	0	0	0	50	28.6023
	LTR12C	50.7659	54.8461	57.6433	51.3575	50.675	52.223	37.6147	7.14286	47.0588	33.7748	27.2727	7.52688	23.6842	0	9.67742	33.3333	0	20	21.4934
	LTR1A2	57.5251	65.8958	61.0577	55.0124	55.2795	53.8819	50.3326	25	59.6491	41.6667	38.8889	37.5	40	0	50	0	0	0	26.5438
	MER4E	89.9478	87.3807	87.6308	93.11	91.3728	90.9294	91.0387	0	78.4314	88.9706	77.7778	42.1053	37.5	22.2222	33.3333	0	0	37.5	28.4244
	MIR	57.4468	62.7409	72	66.0377	51.5152	66.6667	58.8235	50	20	52.381	53.8462	18.1818	42.8571	0	33.3333	100	0	97.4359	29.5064
	MIR3	10	46.6667	50	66.6667	44.4444	66.6667	0	0	50	28.5714	0	60	50	25	0	100	0	0	25.2421
	MIRb	51.1111	63.7363	61.9048	64.4444	48.5714	68.6916	50	50	37.5	47.8261	35.7143	16.6667	33.3333	0	50	100	0	33.3333	29.496
	MIRc	48.8372	53.23	61.1111	63.5294	48.5294	66.6667	47.0588	44.4444	33.3333	45.8333	33.3333	35	37.5	0	50	100	0	33.3333	28.9885
	MLT1A0	40.625	66.7614	71.4286	72.2222	74.4186	71.7557	77.7778	33.3333	33.3333	58.8235	60	36.3636	33.3333	80	25	0	0	50	28.5723
	MLT1C	72.4684	56.9296	66.6667	62.3016	54.1667	77.9904	47.1698	77.7778	79.5455	50.1845	52.7273	49.5146	54.2373	18.1818	79.1667	0	0	54.5732	31.1719
	MLT1K	33.3333	51.5152	0	50	33.3333	75	0	0	0	25	0	0	0	0	33.3333	0	0	0	27.405
	MSTA	62.2093	70.7834	68.5121	72.3735	62.3377	69.697	61.6279	18.75	58.3333	21.1765	31.0345	39.1304	33.3333	25	18.75	0	0	40	22.4458
	SVA_A	46.4183	65.5067	61.6175	57.7285	50.5168	58.848	38.7013	16.6667	23.4783	33.3333	17.0068	17.0576	17.2131	3.39806	15.2542	9.09091	0	17.4603	19.0715
	SVA_B	46.9244	66.1488	68.9416	58.2647	51.9018	61.5793	40.3302	18.9189	31.3043	28.5714	17.3913	18.6047	14.0523	14.8936	17.4419	9.09091	50	16.0714	19.6114
	SVA_C	47.089	65.0794	68.3776	58.4875	51.7921	61.1964	40.2746	18.543	30.9524	28.3117	18.4524	18.0985	15.1515	10.9091	17.4721	8.33333	50	11.5942	18.8161
	SVA_D	47.0688	64.3533	61.0132	58.5935	52.8018	60.6824	41.1215	18.1208	28.5714	27.4869	16.8831	17.6155	15.9884	6.66667	16.2069	7.69231	0	11.9403	17.7093
	SVA_E	45.632	64.06	59.2593	57.889	51.5848	60.6754	40.399	17.6056	28.0702	27.6536	17.4497	17.7901	16.4706	6.84932	15.4122	7.69231	0	12.5	16.7146
	SVA_F	47.5763	67.4163	63.0907	59.5035	55.1643	62.9661	41.519	19.7368	27.3504	28.841	19.6203	18.551	16.1194	9.61538	16.5468	7.69231	0	13.0435	16.7689
	THE1D	57.6037	66.4187	63.5328	72.3716	55.8594	69.697	58.0952	0	47.3684	26	31.25	44	25	0	11.1111	0	0	25	22.8078

## Sheet: S4. 10A bias for all libraries
PLUS strand	TE subfamily name	N1	N2	N3	GCNIS NS1	GCNIS NS2	GCNIS NS3	GCNIS SE1	GCNIS SE2	GCNIS SE3	NS1	NS2	NS3	SE1	SE2	SE3	Fetal brain	Fetal heart	Adult brain	Genome	Supplementary table S4. 10A bias for top piRNA-producing TEs. Boxes marked green if 10A fraction is at least 5% higher than the genome control.
	AluJb	31.439	49.258	48.8372	47.5532	46.9287	54.4708	32.358	19.0821	23.8095	15.7549	23.1325	18.4156	17.2542	13.2812	24.4068	18.1818	0	27.6423	29.4897
	AluJo	30.1068	44.7615	41.6342	42.864	40.9386	40.6885	33.3333	32.277	31.7143	27.3708	32.1391	25.703	24.9342	15.7233	27.9512	19.2308	20	18.6275	29.721
	AluJr	29.0369	40.6811	42.8571	40.367	39.7295	39.012	31.2125	32.1832	30.7463	27.2979	31.5276	25.6318	24.5694	17.0886	26.8156	19.4805	20	18.3333	29.6276
	AluSp	43.631	53.9936	54.2781	58.5572	60.8663	66.4832	43.4783	23.2506	32.7354	22.8019	24.7845	20	20.6504	11.9266	25.5618	19.2308	0	21.4953	30.275
	AluSx	40.0782	51.2715	50.3198	54.9473	57.4427	61.7949	39.1762	22.6734	29.6154	21.3396	25.6014	20.8966	20.4804	14.7887	26.3043	20	0	20.3125	29.7639
	AluSx1	40.8408	51.3094	50.2119	57.5869	57.4523	61.712	39.9024	23.1959	28.9474	24.7934	26.1863	20.8708	22.3301	16.2791	26.4192	25.7143	0	20.9677	29.6875
	AluSz	40.6157	51.2007	50.1071	54.9359	58.0123	62.0362	39.3708	22.3549	28.9575	20.9155	26.0035	21.1659	20.9657	16.9935	26.3499	20.5882	0	21.2598	29.7629
	AluY	32.4238	47.6628	46.3855	49.1547	51.2574	53.5526	35.3198	20.8531	28.2486	21.227	25.2336	18.4966	21.1215	15.3846	23.5495	11.7647	0	20.3704	29.485
	HERVH	39.3531	48.638	47.619	41.9048	44.2424	48.4385	30.9859	14.2857	27.1186	25	19.6429	15.748	14.433	1.99005	20.4545	18.1818	66.6667	8.39161	24.3168
	HERVK9	41.8006	46.2772	48.8764	46.1654	53.1381	49.1091	53.3333	26.6667	44.4444	34.3137	42.8571	23.2323	20.6897	1.54905	18.9189	0	90.3226	19.4444	31.8241
	HERVL	42.1429	45.3099	50.4274	49.0028	48.1188	49.7839	36.7347	12	34.9398	30.1887	18.1818	14.0625	21.7949	10	24.6154	14.2857	33.3333	9.67742	28.5334
	HUERS-P2	23.8095	46.4286	50	36.5591	50	59.7598	27.2727	33.3333	32.1429	20.4082	16.6667	26.9663	6.66667	40	26.9231	0	0	0	27.4616
	L1Hs	46.4803	52.5807	54.5012	48.1789	47.1479	53.4018	42.4051	33.1878	46.4789	42.3384	36.3636	28.6449	40.8	32.8638	40.9556	41.6667	41.6667	36.2903	38.7394
	L1M1	43.8596	47.7337	50	48.1848	57.4257	54.531	38.6364	53.8462	55.5556	38.806	25.9259	17.3333	30	28.5714	43.4783	66.6667	57.1429	32.3529	39.6501
	L1MC4	18.1818	10.2598	10.3896	21.5909	39.1304	39.2857	6.66667	0	27.2727	33.3333	33.3333	25.641	22.7273	0	60	25	0	12.5	39.1477
	L1ME3A	64.8649	59.0206	85.7143	69.3878	58.3333	70.7071	42.8571	100	50	50	27.2727	42.1053	61.5385	50	33.3333	0	0	83.3333	38.8443
	L1PB1	45.8937	51.6749	50.9346	51.4825	45.8333	53.8824	41.1765	43.75	41.9355	40.6977	38.6364	40.7407	33.9623	53.3333	44	0	100	40	40.9304
	L2	42.1053	73.4177	85.625	81.9355	38.2353	81.3747	44.4444	20	6.66667	16.6667	7.31707	3.7594	9.52381	25	20	0	0	8.62069	24.2073
	LTR1	36.1702	30.3062	32.8767	33.2268	29.7872	25.1404	43.4783	0	0	14.2857	11.1111	33.3333	0	0	25	100	0	50	26.1085
	LTR10C	40.5405	44.4232	41.1765	42.9864	39.3258	49.3827	55	0	33.3333	33.3333	0	11.1111	33.3333	0	0	0	0	0	28.6023
	LTR12C	33.7826	33.8525	35.0498	34.1586	32.3464	34.6869	33.5878	24.2424	33.3333	32.4503	21.4286	16.3265	18.75	20	5.71429	0	0	12.5	21.4934
	LTR1A2	89.8455	35.9526	33.3333	93.3194	67.7305	89.6284	90.1575	33.3333	82.3529	75.5102	16.6667	14.5833	0	0	16.6667	100	0	15.3846	26.5438
	MER4E	42.1053	51.1699	54.6012	52.9204	56.7568	64.1425	58	0	25	26.6667	60	11.1111	40	33.3333	50	0	0	20	28.4244
	MIR	19.1489	29.562	70.4545	32.0988	16.6667	32.5758	10.5263	22.2222	9.09091	25	10.7143	22.7273	22.2222	0	5.88235	0	0	12.5	29.5064
	MIR3	0	5.26316	0	4.7619	1.35501	25	0	0	0	5.26316	0	0.0513347	14.2857	0	0	0	0	0	25.2421
	MIRb	2.06897	18.6441	63.2653	12.8713	5.61224	22.6519	1.96078	6.45161	3.2	2.13904	4.62428	2.23214	11.1111	0	4.23729	0	0	13.8365	29.496
	MIRc	0.184162	6.94195	17.4603	1.82724	0.536847	1.01032	0.657895	0.075188	0.111566	0.468384	0.42735	0.916497	0.508259	0	0.41806	0	0	9.34579	28.9885
	MLT1A0	31.6667	35.8382	44.8276	37.5723	21.4286	44.2708	42.8571	0	0	18.1818	26.6667	22.2222	7.69231	25	0	0	0	0	28.5723
	MLT1C	42.1053	48.8152	36.6667	31.8182	25.7143	33.913	30.7692	0	50	46.1538	25	5.26316	25	33.3333	11.1111	0	0	0	31.1719
	MLT1K	11.1111	17.8082	0	33.3333	20	50	0	0	50	33.3333	33.3333	14.2857	0	0	50	0	0	0	27.405
	MSTA	38.6266	31.6706	33.0986	47.4623	48.4848	56.6707	37.9747	21.0526	44.4444	20.8333	22.8571	14.2857	17.8571	16.6667	41.1765	0	0	25	22.4458
	SVA_A	39.6351	49.6062	55.2448	52.9055	42.7021	59.567	46.5753	19.685	30.9179	26.3757	21.7391	17.5676	15.9705	21.7391	23.7736	42.8571	0	12.069	19.0715
	SVA_B	42.8115	56.0117	58.9661	56.2643	48.41	64.3626	51.1146	19.1489	33.7838	28.1304	23.6842	16.1412	17.7528	33.3333	26.3941	12.5	0	14.8649	19.6114
	SVA_C	42.0161	53.3773	56.5147	53.3851	44.6387	62.2987	49.1339	17.9856	31.6742	26.4151	20.4762	16.1372	16.8919	28.8462	24.911	12.5	0	11.5942	18.8161
	SVA_D	42.7147	52.447	57.4283	55.6377	47.7379	63.0037	49.5066	18.1818	33.195	27.0833	21.4286	16.4474	16.3972	25.4902	24.5614	16.6667	0	10.9375	17.7093
	SVA_E	44.0751	51.9717	55.4631	56.4412	47.6237	63.2745	49.5512	19.8413	34.6341	28.6267	22.1053	15.9763	15.5	26	23.8636	16.6667	0	9.67742	16.7146
	SVA_F	41.659	52.3864	57.7138	55.338	48.0354	63.7979	48.7633	17.8808	32.8889	26.8683	21.875	16.1119	15.0943	23.5294	23.741	16.6667	0	9.375	16.7689
	THE1D	32.0346	30.5267	40.2597	39.2447	35.5556	50.8096	33.3333	9.09091	52.1739	36.3636	18.5185	26.9231	28	60	38.4615	0	0	16.6667	22.8078
MINUS strand	TE subfamily name	N1	N2	N3	GCNIS NS1	GCNIS NS2	GCNIS NS3	GCNIS SE1	GCNIS SE2	GCNIS SE3	NS1	NS2	NS3	SE1	SE2	SE3	Fetal brain	Fetal heart	Adult brain	Genome
	AluJb	18.0195	37.0172	44.1379	25.6781	27.9853	31.2538	17.0877	16.2319	19.9262	11.8978	18.8776	18.149	14.3513	16.1017	17.3697	14.0127	31.5789	50	19.8756
	AluJo	16.3366	30.4729	34.9091	21.9321	26.9327	32.9123	17.9396	15.8249	20.7171	10.8934	20	17.4591	14.4472	19.0909	17.3913	14.1844	36.3636	50	20.3426
	AluJr	16.788	33.8638	38.9831	23.2841	28.13	33.951	19.8113	17.0909	20.7547	12.9058	21.4575	19.6581	14.1207	20	19.0616	16.3121	34.375	33.3333	20.9552
	AluSp	20.5872	40.8105	49.0018	34.678	32.265	42.1486	21.6809	18.0157	20.743	14.4399	19.7432	18.4273	14.0759	17.0732	15.7895	16.0584	24	33.3333	17.9331
	AluSx	21.044	43.672	53.7859	37.9318	32.8153	39.224	21.5385	16.0331	22.4537	15.2356	21.1845	17.0106	14.262	16.3842	15.5143	14.2132	25	25	18.5823
	AluSx1	20.8735	43.61	53.8462	37.8159	32.8411	39.2826	21.0402	16.32	22.7064	15.3925	20.8054	17.3205	14.5251	16.8539	15.2961	14.1414	25.7143	25	18.5247
	AluSz	20.6217	44.1983	53.4211	38.3478	32.5341	39.4685	21.34	16.9435	22.7907	14.8778	21.4205	17.0732	14.616	17.4419	15.8249	15.4639	24.3243	25	19.1583
	AluY	18.7176	38.806	47.0779	33.0486	33.3741	37.4272	18.5766	18.9055	19.0114	13.4416	17.5041	18.9279	14.2857	18.4211	17.0316	10.6509	34.375	50	16.2568
	HERVH	35.8289	35.5501	40	36.9671	38.1279	42.6887	15.6352	16.2162	24.3697	13.719	20.8955	20	8.66142	6.15385	19.8276	4.4335	10	58.3333	28.903
	HERVK9	40.4858	41.1228	46.1988	43.0255	39.0244	42.5176	25.5319	75	36.3636	39.6396	9.09091	8.97436	46.1538	5.55556	30.4348	41.3043	0	0	27.3277
	HERVL	45.279	44.5571	47.1311	46.2926	44.5923	46.0173	28.3784	18.1818	33.3333	35.2518	22.2222	18.6275	22.2222	50	23.3333	64.1026	0	0	27.1124
	HUERS-P2	18.8209	18.6412	25.7042	20.8842	20.9416	19.5464	10.0145	11.6352	18.8312	11.4754	15.9091	7.58514	12.3209	16.6667	14.2857	10	10.7143	0	25.9778
	L1Hs	34.5975	41.25	42.7686	38.9144	38.8929	41.8377	26.9275	17.3913	28.125	25.1869	17.2549	17.9688	21.0526	26.7717	17.0868	15.2381	21.0526	37.5	19.5731
	L1M1	24.6988	29.7007	43.3333	30.0725	30.2564	30.0917	23.8095	10	16.6667	22.0588	13.1579	11.1111	13.3333	11.1111	2.08333	21.0526	0	100	22.6581
	L1MC4	60.7143	44.3609	85.7143	47.8261	17.6471	28.125	0	0	21.7391	38.8889	0	36	16.6667	0	28.5714	26.3158	100	0	26.9405
	L1ME3A	35.2941	37.5262	30	73.7705	89.418	76.5	64.5833	93.8596	75.9259	77.8761	93.0736	85.8824	44.4444	33.3333	65.1163	7.69231	77.7778	0	27.8423
	L1PB1	28.1481	19.7781	23.1156	27.6457	33.1606	32.4093	24.8276	31.25	21.0526	32.9545	20.8333	18.1818	10.3448	10.3448	18.1818	40	100	0	21.2246
	L2	35.4839	63.6121	73.3333	72.0588	25.4902	61.0063	45	25	8.69565	12.766	17.8571	3.45622	28.5714	0	30.9524	16.4384	0	0	34.0459
	LTR1	63.9344	41.6224	44.0613	71.5937	74.8598	74.5929	71.734	2.5641	38.1579	16.895	19.5122	4	0	0	0.892857	8.33333	0	0	19.2778
	LTR10C	78.5582	44.7152	53.923	81.9354	74.6763	83.9135	84.1542	0	67.5	81.4286	60	55.5556	40	0	0	0	0	0	32.2374
	LTR12C	47.9212	43.2583	41.7197	46.6063	43.9252	50.6924	34.8624	21.4286	35.2941	33.1126	15.1515	9.13978	23.6842	7.14286	12.9032	10	33.3333	100	20.5222
	LTR1A2	66.8896	47.0845	47.6648	72.3014	74.7116	73.9597	72.949	25	57.8947	68.3333	55.5556	6.25	0	50	0	28.5714	0	0	18.7731
	MER4E	71.5405	50.0415	45.2902	67.4495	69.2695	53.6959	70.0611	0	47.0588	66.1765	55.5556	15.7895	12.5	0	33.3333	25	0	0	31.58
	MIR	29.7872	37.045	24	31.1321	45.4545	40.9091	23.5294	20	40	28.5714	15.3846	54.5455	14.2857	100	33.3333	2.5641	0	0	31.1371
	MIR3	30	41.6667	50	16.6667	33.3333	33.3333	0	0	50	14.2857	0	10	0	25	0	0	0	0	30.8184
	MIRb	37.7778	33.5165	23.8095	30	51.4286	36.9159	27.2727	40	37.5	26.087	14.2857	50	0	50	25	33.3333	0	0	29.922
	MIRc	39.5349	37.7261	27.7778	29.4118	50	38.8889	29.4118	44.4444	33.3333	29.1667	13.3333	35	0	50	25	33.3333	50	0	30.3169
	MLT1A0	34.375	32.9545	42.8571	27.7778	23.2558	32.8244	0	33.3333	33.3333	35.2941	10	18.1818	33.3333	0	37.5	0	0	0	27.7894
	MLT1C	26.5823	63.1841	76.4706	45.6349	41.6667	59.8086	45.283	11.1111	9.09091	41.3284	38.1818	42.7184	38.9831	45.4545	16.6667	44.8171	0	0	24.5957
	MLT1K	0	18.1818	0	0	33.3333	25	0	0	0	25	40	16.6667	0	0	0	0	0	0	27.9507
	MSTA	43.6047	48.9862	45.3287	50.1946	57.5758	55.8994	45.3488	12.5	41.6667	22.3529	31.0345	30.4348	20	0	18.75	20	0	0	32.1602
	SVA_A	47.1824	63.4265	65.2118	56.7883	55.0388	61.4556	44.9351	30.1282	33.913	28.8095	29.2517	26.5458	24.0437	51.9417	26.7797	17.4603	9.09091	100	22.484
	SVA_B	46.4851	60.5954	68.8427	56.5844	54.1718	59.2474	41.5094	27.7027	36.5217	30.6878	29.1925	24.4798	23.5294	21.2766	23.6434	14.2857	0	50	21.6411
	SVA_C	46.9178	65.3679	68.9276	56.8692	55.0777	60.5579	42.3341	25.8278	34.9206	31.1688	31.5476	24.3986	24.8485	30.9091	24.9071	11.5942	0	50	21.0075
	SVA_D	48.0884	67.5987	66.5198	58.2649	56.4991	62.4326	45.7944	29.5302	38.8889	31.6754	25.974	26.4232	25.5814	26.6667	25.8621	11.9403	7.69231	100	19.4354
	SVA_E	48.3271	66.1343	69.3122	59.2673	58.1728	63.3794	45.8853	29.5775	41.2281	31.5642	26.1745	26.5193	25.8824	26.0274	25.448	10.9375	7.69231	100	19.2387
	SVA_F	48.474	63.1684	64.6232	58.2624	58.5681	62.4264	44.8101	28.9474	40.1709	31.8059	29.7468	26.1251	25.6716	42.3077	25.8993	11.5942	7.69231	100	16.8701
	THE1D	45.6221	50.1532	46.7236	44.3765	51.9531	48.1112	40	38.4615	73.6842	46	21.875	32	43.75	33.3333	61.1111	50	0	0	32.6393

## Sheet: S5. Ping-pong Z-score, all
TE subfamily name	N1	N2	N3	GCNIS NS1	GCNIS NS2	GCNIS NS3	GCNIS SE1	GCNIS SE2	GCNIS SE3	NS1	NS2	NS3	SE1	SE2	SE3	Fetal brain	Fetal heart	Adult brain
AluJb	0.60813	6.4411	2.53891	1.68359	5.01522	4.82562	1.19869	0.531508	0.286696	-0.0741455	0.448185	1.28654	0.000835162	-0.689438	0.72452	1.42332	0	0.847124
AluJo	0.967709	2.46232	1.00392	1.80638	2.18495	1.1267	0.712754	0.745458	0.389753	0.496103	0.00309314	0.961003	0.530393	-0.021945	0.889945	1.09808	0	0.260988
AluJr	0.963008	3.30176	0.867863	1.79652	2.0587	0.946541	0.601831	0.493525	0.385424	0.375742	-0.0915425	0.509459	0.509604	-0.264515	0.615173	0.21568	0.853325	0.303869
AluSp	1.26388	7.12441	5.41436	5.97968	4.82902	13.5304	1.52572	0.0573657	0.308112	-0.0333627	0.59088	1.82877	-0.0668605	0.112491	0.287665	2.59478	-0.208514	0.726571
AluSx	1.50801	7.18097	5.23173	5.76743	4.70199	8.49196	1.29055	0.247178	0.935756	0.164311	0.614718	1.28372	0.103718	0.412266	0.126506	2.34382	0	0.476404
AluSx1	1.49281	7.19294	5.23713	5.79327	4.70371	8.55443	1.22431	0.30288	0.936589	0.175905	0.596959	1.26129	0.0665754	0.403148	0.110003	2.42763	0	0.483182
AluSz	1.33235	7.2335	5.21642	5.9196	4.45563	8.6746	1.17245	0.255031	1.00704	0.139813	0.562321	1.27358	0.122985	-0.135435	0.163706	2.20439	0	0.448694
AluY	0.696549	6.23631	3.47844	3.42755	5.60833	9.98307	1.1284	0.593881	0.821066	0.0990431	0.586604	0.752756	-0.0185403	-0.328669	0.107506	2.22179	0	0.776379
HERVH	3.99142	13.0507	4.77107	7.1549	7.39892	4.68258	5.48627	-0.125033	0.788315	2.80837	-0.617628	7.76975	2.39693	0	2.3604	0	0	34.4079
HERVK9	0.748838	6.56253	1.53084	1.21517	0.1392	1.69553	-0.663325	-0.208514	1.36668	2.39073	9.38315	1.36292	0	0	0	0	0	-0.419322
HERVL	4.67858	13.3806	8.29143	8.33117	2.70695	4.44875	0.225991	-0.208514	4.22678	0.61941	-0.301823	-0.714244	-0.378785	-0.284981	-0.301823	0	0	4.58732
HUERS-P2	-0.304439	1.27916	0.928375	-0.394862	0.867516	1.77034	-0.550809	0	0.471221	0	-0.299803	-0.360262	0	0	-0.208514	0	0	0
L1Hs	3.69211	6.13963	5.76365	3.76685	3.25272	4.83707	0.741216	0.777925	0.460891	1.52023	1.07702	0.714044	0.962806	1.18495	-0.354548	0	0	-0.0367012
L1M1	3.36459	2.61638	2.09177	3.56584	2.48047	2.03383	0.781512	0	-0.208514	1.23252	-0.301823	1.24532	-0.35775	4.58732	-0.419322	0	0	-0.208514
L1MC4	44.4499	-0.271436	-0.301823	1.06352	2.52523	0.196095	-0.217084	0	0	0.545119	-0.284981	-0.354183	0	0	0	0	0	-0.247532
L1ME3A	0.807681	1.59872	0.0665116	2.24717	4.82522	0.769899	-0.378785	-0.208514	-0.238736	-0.61804	-0.354183	-0.301823	0.219551	-0.58103	-0.362478	0	0	-0.208514
L1PB1	0.696743	1.43283	1.17195	2.17684	1.66835	2.42674	3.05436	1.33921	0.563822	1.4729	0.332926	-0.78416	2.19054	-0.301823	-0.664093	0	0	0
L2	2.23935	0.513916	2.03417	0.48309	-0.58103	-0.0479466	-0.253032	0	-0.301823	-0.652113	-0.267424	1.44961	-0.208514	-0.301823	-0.208514	0	0	-0.289228
LTR1	1.90294	3.73437	3.70175	3.71304	0.837644	7.08338	4.93937	0	-0.378785	-0.506514	1.30492	1.1937	0	0	0	0	0	0
LTR10C	2.00006	3.71039	1.35478	3.0603	-0.0511769	4.64894	0.930804	0	-0.208514	41.2451	-0.284981	-0.301823	0	0	0	0	0	0
LTR12C	4.96717	6.48963	4.1847	5.3224	5.60502	6.57117	5.10373	-0.842701	1.43614	2.71172	2.70334	1.06729	-0.725689	-0.208514	0.927358	0	0	3.16914
LTR1A2	3.5012	4.41694	4.06171	10.2143	3.10272	12.6789	4.91754	0	-0.487111	-0.54525	1.43366	2.18521	0	0	0	0	0	-0.208514
MER4E	4.19599	2.22217	1.30669	0.340287	4.51544	4.89411	2.32128	0	-0.464642	0.387591	-0.301823	-0.332344	-0.378785	0	-0.208514	0	0	0
MIR	0.17567	0.498798	0.200194	2.3924	1.27476	-0.410547	-0.240918	1.2198	-0.448746	1.13925	1.32346	2.13154	-0.551928	0	0.338045	0	0	-0.225856
MIR3	-0.701339	-0.332478	-0.284981	-0.605197	-0.559204	-0.917495	0	0	0	-0.208514	-0.208514	-0.18825	-0.301823	0	0	0	0	0
MIRb	-0.375329	0.328946	-0.274576	-0.409112	-0.203901	-0.555232	-0.132086	1.13864	-0.249034	-0.108924	-0.324183	-0.308116	-0.351836	0	0	0	0	-0.354183
MIRc	-0.3747	1.79134	-0.0123889	-0.420446	-0.204798	-0.401846	-0.28164	1.13864	-0.289799	-0.153843	-0.354562	-0.386141	-0.414026	0	0	-0.208514	0	-0.354183
MLT1A0	-0.00862913	1.73724	0.593572	1.27774	1.88494	0.580642	-0.498303	-0.596158	-0.354183	-0.51715	0.692524	4.58732	-0.607272	-0.354183	-0.419322	0	0	0
MLT1C	1.82636	3.38604	3.00785	3.02566	1.08761	3.92142	-0.425922	-0.208514	-0.354183	0.200881	5.42926	-0.320527	1.36386	-0.308138	-0.208514	0	0	-0.354183
MLT1K	0	-0.486575	0	-0.208514	0	-0.208514	0	0	0	0	0	-0.502264	0	0	0	0	0	0
MSTA	1.43779	1.05583	0.68475	1.65372	0.199561	1.35291	1.34638	-0.671408	1.77135	0.134037	-0.455573	1.3966	-0.654724	-0.301823	-0.612534	0	0	-0.301823
SVA_A	4.34222	5.66645	5.53397	4.72033	8.3179	8.38006	5.07799	1.10025	0.208175	0.204573	0.106149	0.144509	-0.121409	-0.473733	0.323864	-0.208514	0	0.8223
SVA_B	5.82466	5.87937	5.39036	5.08071	11.8806	10.2239	4.06827	0.649431	0.359087	0.117312	0.040455	0.00937025	-0.189518	-0.453304	-0.0985293	-0.208514	0	0.116519
SVA_C	5.95453	5.64343	5.26939	5.10549	12.0925	10.2815	4.14682	0.656823	0.397385	0.162089	0.0411774	0.145733	-0.181123	-0.538294	-0.151862	-0.208514	0	0.264106
SVA_D	6.4708	6.21001	5.90195	5.69319	12.4669	10.3981	5.56507	0.9722	0.984228	0.288881	-0.00286898	0.277302	0.0758133	-0.675324	0.398919	-0.208514	0	0.62117
SVA_E	6.37885	6.03743	4.67204	5.65252	13.0791	10.4111	5.46295	0.718766	1.035	0.115933	0.00356719	0.278417	0.0253028	-0.650924	0.4343	0	0	0.495402
SVA_F	6.91663	5.28375	4.87179	6.43049	13.4148	11.9646	5.48186	0.613406	0.754949	0.068356	-0.00636107	0.307871	-0.103902	-0.547516	0.263082	-0.208514	0	0.616843
THE1D	0.870514	1.83092	0.931562	0.928669	-0.0791344	0.920247	0.678594	1.13864	0.654289	0.519273	0.545119	-0.274913	1.85566	-0.301823	-0.537365	0	0	0
Supplementary table S5. Ping-pong Z-score for top piRNA-producing TEs. Boxes marked green if Z-score value is at least 2 or higher (corresponding to p-value <0.05).

## Sheet: S6.TE deriving sRNAs,TERA1
TE subfamily name	TERA1 scRNA	TERA siRNA		Supplementary table S6. Fraction of top TE-deriving small RNAs in TERA1 during PL2L60A knockdown experiment (sorted in descending order by small RNA RPM for each TE subfamily, data for one of the biological triplicates are shown).
L1PA3	103.071	90.7438
AluSx1	1724.78	940.893
L2a	1366.29	1175.55
MIRb	1177.02	943.205
HERVH-int	1107.49	1305.99
MIR	878.545	734.362
HERVE_a-int	860.072	1036.43
AluJr	826.191	685.174
L2c	808.168	683.444
AluJo	755.937	633.681
AluJb	709.294	636.666
AluSp	703.586	197.898
L1MCc	702.603	405.531
AluSx	655.982	548.976
L2	530.702	421.735
L1M1	499.81	354.887
L1ME2	498.246	374.333
AluSz	493.73	446.301
MIRc	487.597	404.675
L1M5	484.921	425.783
AluY	440.563	437.139
L3	422.12	327.466
L2b	414.511	360.318
L1MEc	399.937	296.216
MLT2B4	386.346	235.893
L1PA7	380.055	349.468
L1ME1	327.37	292.573
MLT1A0	320.016	163.607
MIR3	320.007	271.069
L1PA3	316.937	323.53
L1PA4	290.426	296.755
L1M4	273.658	213.748
AluSq2	269.62	247.786
AluSz6	251.077	228.419
L1MEg	249.109	190.041
L1PA5	244.039	244.759
AluSc	234.342	177.379
L1MB7	233.914	211.599
L1PB1	230.803	210.334
HAL1	229.251	196.168
L1MC4	227.627	190.377
L1MA2	225.623	188.344
L1MEd	223.613	180.646
L1MC1	211.62	177.821
L1MC4a	202.308	169.93
AluJr4	197.818	173.768
L1ME4a	192.176	157.469
L1PA6	191.198	183.795
L1PA16	190.2	173.296
L1MA3	181.994	165.435
L1MA9	170.485	141.157
AluSx3	169.125	167.135
AluSg	168.374	154.146
LTR7	167.961	185.72
L1MB8	163.913	153.512
L1PA2	163.803	160.214
L1ME3A	159.859	117.237
MER5A	158.186	134.184
L1ME4b	156.888	130.999
L1MEf	155.919	156.194
L1MA1	155.156	123.905
L1MCa	154.291	106.329
HERVK-int	151.845	166.796
L1MC5a	148.665	132.637
MLT1A0-int	146.071	91.455
L1MB3	145.228	133.203
L1PA13	144.705	118.65
L1MC5	135.61	119.074
MLT1H	133.013	93.722
MLT1D	132.133	113.454
HUERS-P3b-int	131.035	134.05

## Sheet: S7. Length, 1U&10A bias,TERA1
TE subfamily name	Small RNA length, nt																			PLUS strand		MINUS strand			Supplementary table S7. Fraction of TE-deriving small RNAs by length in TERA1 cell line (length distribution, marked green if higher than 4%) in TERA1 (scRNA treated) and 1U/10A bias (marked green if higher than 30%).
	17	18	19	20	21	22	23	24	25	26	27	28	29	30	31	32	33	34	35	1U bias	10A bias	1U bias	10A bias
AluSp	6.55764	71.8414	2.36045	3.07935	1.03303	1.86118	1.32865	1.53503	1.98086	1.14829	1.01911	0.919047	0.953403	1.06081	0.852702	0.493628	0.413523	0.23703	0.353217	2.45793	4.64785	5.20667	83.6805
AluSx1	1.8379	1.51866	1.55857	2.64601	3.91678	5.44144	4.76329	4.61629	3.80712	3.89814	2.89026	2.28345	2.18002	2.06282	1.95591	1.60599	1.06845	1.09354	0.956667	66.491	10.3287	23.2497	18.9796
L1ME2	0.146516	0.525411	39.8659	8.34056	7.03344	6.35446	6.34375	4.1257	2.81602	0.154027	0.192144	0.192373	7.4553	10.7995	2.49854	1.49987	1.30664	0.0775055	0.000171743	8.01172	0.53234	20.9215	37.7059
HUERS-P3b-int	37.5458	57.5074	1.42507	1.79753	0.461528	0.291491	0.0485818	0.0987777	0.0161939	0	0.0485818	0.0485818	0.0485818	0	0.127527	0	0	0	0	24.608	29.4331	41.2989	41.1523
HERVE_a-int	0.614478	0.71379	50.7993	9.39187	8.31572	7.27218	7.58198	4.5981	3.32629	1.56531	0.391328	0.48916	0	0.195664	2.4458	0.684824	0.195664	0.146748	0.831572	0	4.88021	11.3096	3.32981
L1M1	24.0547	2.51914	1.93035	1.07241	5.03414	4.49672	3.7442	0.61268	0.50374	0.156586	0.440509	0.413017	0.242147	0.243273	0.164865	0.0581766	0.056368	0.0558974	0.110271	4.88966	68.5073	28.9364	12.5215
HERVH-int	5.92039	3.31773	4.08086	5.27547	5.51563	8.49376	8.86792	7.47898	7.60577	5.64456	7.17581	4.53442	5.39604	2.89064	3.65909	3.79143	3.12169	2.02479	2.19821	13.9106	24.1429	22.2543	25.6548
MIR	49.2984	1.62414	0.975185	1.11377	2.47649	3.17434	4.43246	2.45847	1.94026	1.94748	1.73747	1.3881	1.6821	2.9291	3.74485	1.50007	1.12232	6.50169	6.79281	20.5994	5.44749	29.2255	21.8008
AluY	2.44491	3.10921	2.5465	4.53174	6.56793	9.88927	9.69485	9.64213	7.75986	7.97725	6.19589	5.24963	4.68973	2.85537	3.86031	2.68279	3.31936	2.47573	2.72901	9.41409	29.8715	24.8586	17.7454
AluSx	2.74179	2.68029	2.99737	4.31145	7.89471	10.342	9.34762	9.4648	8.50879	6.39176	5.29134	4.59208	3.53591	4.48651	4.38538	3.22828	2.2916	2.068	1.59969	12.5665	29.5694	24.1564	19.7573
AluJb	3.36419	4.0156	3.43766	5.14513	7.3947	10.4518	10.3636	10.2701	6.69543	6.53354	4.7773	4.55299	4.48105	4.38417	2.92154	2.43405	2.83873	2.65787	1.67476	12.941	27.8635	19.3539	22.2906
L2c	3.49615	2.46234	5.41588	6.60267	3.98588	4.22136	42.8901	5.39272	7.37024	3.39325	1.18464	1.48254	1.97416	2.17766	1.58138	1.11233	0.948032	0.989665	0.79072	26.7027	30.9876	59.0034	9.61423
AluSz	3.95836	3.23276	3.17301	4.71076	8.39491	10.3464	8.95227	10.0325	9.00849	6.67114	5.49095	4.7478	3.47064	3.68601	3.21924	3.00894	2.13991	2.11748	1.31919	12.1829	28.3382	24.9248	20.0173
AluJr	3.676	4.99253	4.41608	4.40336	5.79827	9.50935	8.48159	8.16587	6.83026	4.9683	4.89785	4.63085	3.99243	4.04793	4.03383	3.10058	3.88226	6.12074	1.08295	13.0586	25.5416	23.4339	18.7417
AluSc	1.5013	1.4575	1.75653	2.30227	3.7588	8.19108	5.83369	5.76499	3.58034	3.50871	2.72227	2.05149	1.69553	1.49366	1.42552	0.886826	0.852807	1.04902	0.686459	4.90564	11.8649	22.4992	33.1875
MIRb	10.6739	3.7218	3.68745	2.5441	4.75057	8.15938	5.02753	6.29344	7.32227	6.90764	6.01119	6.6816	2.80441	2.35996	3.03903	3.48351	1.92698	2.71919	2.58821	23.4188	22.7837	27.7055	28.879
AluJo	2.9743	2.62834	3.49635	3.77977	6.44519	11.6008	9.628	7.4467	6.92869	5.79387	4.28967	5.1234	5.10284	6.61203	3.83018	1.71476	4.83671	3.84706	2.04341	10.0391	26.6937	21.6095	21.0169
MER5B	90.4717	0.236226	0.958654	0.614891	0.946267	0.87296	0.710105	1.06316	1.18428	0.361016	0.275662	0.237343	0.353972	0.589968	0.236903	0.472555	0.236226	0.000595349	0.000512873	5.58861	31.4775	0.655257	1.24363
L2a	6.6892	8.43262	6.10476	5.8232	7.95135	6.20536	5.20656	4.22562	3.87999	2.91552	4.18527	4.08638	4.06414	2.27229	2.89204	4.19519	2.87071	3.83696	3.71079	32.4686	22.9342	26.1536	23.7059
AluSq2	2.51364	2.66825	2.5218	3.61093	9.02335	13.1125	8.79673	8.72876	7.71778	6.68145	6.07784	4.90731	3.82732	4.70513	4.9128	2.90587	1.64131	2.12439	1.53349	10.4979	27.6652	24.8469	19.7406
HERV3-int	39.1323	57.5462	1.53212	0.306876	0.306423	0.0766058	8.66091e-05	0.153212	0	0.0766058	0.000151695	0.306626	0.153212	0	0.153394	0.000589674	3.97627e-05	0.000132193	0	0	50.0472	39.3255	38.5479
L1PA3	2.07607	3.92634	6.08001	4.58125	7.2398	10.0503	8.36175	9.22812	7.01529	5.90407	6.64833	4.15933	4.28543	3.98659	1.07075	3.9748	3.91007	3.14731	2.38631	13.0665	29.3149	21.078	17.2006
MIRc	2.82118	3.17349	5.41953	19.7096	5.048	5.77109	3.78593	5.6587	4.36798	4.35868	2.31322	5.22649	6.53085	4.52804	6.79295	3.48627	2.43826	2.96229	1.74556	12.4871	8.24529	19.7601	26.5582
LTR7	2.93176	2.97572	3.91673	4.41905	5.96619	10.4056	12.0947	7.06096	5.67701	6.59897	3.45785	4.57354	4.64485	5.86544	6.49327	4.66858	2.91469	2.21262	1.83597	37.7964	16.7153	42.954	19.2505
AluSz6	3.19064	4.43873	3.57974	4.04127	7.23312	10.3648	14.3694	11.6663	7.63038	6.21201	3.45515	2.86459	2.35837	4.16902	3.0778	2.22509	1.67427	2.3302	1.68896	11.7993	23.3784	22.8768	21.1714
L1PA2	0.993856	4.1633	6.67735	5.32942	9.37856	9.44095	8.25394	9.09547	7.59535	6.40331	7.0857	3.11475	4.38922	4.28198	1.74222	3.37846	4.30806	1.66857	1.57647	13.4386	33.4667	23.428	17.8117
AluSg	2.91877	2.26013	2.73222	3.97983	6.30289	11.0716	11.1481	8.01107	6.94996	6.87007	5.83334	5.53521	4.65089	5.00231	3.92506	2.73783	2.71784	2.39676	2.20001	14.7154	35.9257	21.7517	21.8028
L2b	8.21702	5.79771	4.57858	4.26047	7.73203	4.26921	16.2211	5.12137	3.72994	4.8914	2.18936	4.24258	3.69576	3.80481	4.35167	2.83115	2.17439	2.03449	2.3915	50.7216	47.0103	0	100
MIR3	3.46475	2.03943	2.78758	5.05921	5.61728	5.73817	8.66655	3.81878	6.10719	4.51724	5.54152	4.62203	3.80087	2.37557	6.9078	4.28711	5.7018	3.32714	9.57158	17.5024	23.8768	33.8208	20.2651
L1PA4	2.54411	3.88348	6.01175	3.92095	6.22739	9.2762	8.5415	10.3193	6.68331	7.48062	4.65267	4.87799	3.60614	4.2697	2.78807	4.22806	3.46434	3.1147	2.27663	23.3852	16.8997	19.1035	46.0195
AluSx3	2.47464	2.37089	2.77117	3.35818	8.09784	10.6678	9.77524	9.60019	8.54282	7.20864	4.656	4.82397	4.14935	3.4716	3.41969	5.0574	1.57578	3.03337	2.23581	13.2303	26.7359	22.358	14.0181
LTR5_Hs	0.212669	6.28102	3.69499	9.10046	7.18621	16.6928	9.28333	6.16572	6.64407	8.79918	3.78172	4.58881	3.85335	2.72972	1.4992	1.94893	1.41563	3.07151	2.72974	12.8525	28.4503	24.7052	16.8935
L1PA7	2.95174	10.4435	5.10977	3.58454	6.26194	6.26645	5.24897	10.7115	4.7405	6.61491	4.01447	3.04074	5.02743	2.6536	2.44665	3.84878	1.51891	1.46134	1.23906	14.2182	31.9716	16.7302	24.6856
L2	6.06136	7.64219	5.25463	2.95307	2.86479	9.77944	6.65436	8.80143	5.66385	5.59323	3.51592	5.62571	5.23211	5.97051	2.819	1.41881	3.16194	1.7654	1.06386	19.0194	43.114	18.9438	22.2809
L1PA5	3.77485	5.15062	4.56236	3.84933	8.23417	8.70706	7.00791	7.61271	6.57036	6.77225	3.38075	6.67941	3.86468	3.96877	4.53773	4.13882	3.17022	3.0886	2.24066	22.3789	26.1786	25.5905	32.1844
AluSc8	2.72502	2.51881	2.54057	5.65476	6.65355	11.6146	9.58633	11.3624	8.35416	6.1004	5.2805	4.93403	3.52251	3.27644	2.901	3.47295	1.72022	3.99871	1.33287	15.7159	30.4796	24.5917	14.2413
MER5A	1.27972	0.889376	3.46461	3.70791	6.8804	9.32222	7.71609	8.03824	10.225	4.45379	1.33504	3.11426	3.55645	9.33424	18.2254	1.34291	0.890208	0.445612	1.77821	13.3629	29.9076	27.063	20.6422
L1PA6	5.37933	6.81292	5.79241	3.31221	8.76761	9.69632	7.81062	7.51776	6.39425	4.63462	3.65992	6.53904	6.06692	2.79166	2.46791	2.22248	4.31857	1.91616	2.37015	10.3912	11.6405	27.4979	15.9232
L1HS	1.20661	4.62566	6.75439	5.67809	9.56892	9.20329	7.19019	8.3687	9.3202	5.71904	5.71732	5.4499	4.29248	4.73772	2.31894	3.28785	3.16293	1.33306	1.07987	19.4046	29.4502	23.5281	21.0472
MADE1	0.46901	0.168544	0.000111647	1.33035	23.0757	65.1042	1.83823	0.468794	0.000128796	0.0036053	0.000637962	0.00146998	0.000734047	0.00146493	0.939254	0.00350461	0.00133802	0.941061	0.0119719	9.23148	34.6387	22.9386	19.3499
AluSq	2.32557	3.77339	3.04473	4.01111	8.94038	10.5958	9.23568	9.58261	7.36278	5.61102	5.14153	4.49914	3.17954	5.4736	4.80715	3.01716	2.12648	2.50948	2.4746	44.1493	43.0945	18.5848	16.5254
AluJr4	3.42976	4.06796	2.08451	4.03942	5.84606	10.7086	7.24382	7.92967	7.00918	6.03787	6.01241	3.56229	4.35577	5.93904	3.73593	2.96351	4.91747	5.22092	1.33774	13.0739	27.7733	28.1421	17.1511
LTR26	0.245623	0.0233919	0.0111643	11.7895	71.2282	2.94738	0.000277688	11.7895	0.982459	0	0.491229	0	0	0	0	0	0	0	0	10.7622	31.2392	28.5345	18.3331
L1MC4	4.91804	8.02999	1.92493	1.7088	10.9091	7.81609	8.40912	3.15278	4.30832	3.78793	3.7728	3.2597	1.61669	1.09403	1.62745	25.3812	1.61901	2.16449	1.08283	11.9332	24.3437	0	0
L1MDa	0.804305	1.68847	55.3956	0.0249492	0.0462848	28.627	1.73032	1.70624	0.585559	1.13209	0.571478	0.566686	0.00176142	1.68883	1.69228	0.578187	0.00131347	1.69044	0.577705	0	4.51404	0.495049	7.97117e-06
HERVIP10FH-int	28.7815	62.3344	3.43053	0.175261	1.18683	0.925833	0.768054	0.950165	0.64095	0.0597656	0	0.175261	0	0	0.000818386	0	0	0	0.570598	14.9223	28.28	72.9586	17.1133
L1ME4a	2.6762	1.94247	2.42843	3.52821	0.712141	5.51398	3.09232	12.2433	14.4823	24.3107	10.4155	1.48366	2.89446	1.74288	1.78762	1.85708	0.081331	2.32235	1.74132	6.7994	58.9667	91.3757	0.70234
L1M5	10.9679	5.36469	3.87593	4.3061	11.2721	3.53993	7.74502	8.3782	4.88655	3.63874	1.81156	4.27963	5.48498	6.9551	3.67829	3.10193	2.41783	1.85697	0.628639	18.3191	62.9613	88.7668	1.27506
L3	6.47849	7.72108	6.34347	10.3058	6.11491	6.28983	3.67372	3.74687	4.28525	3.03094	3.34957	8.05617	2.41584	6.0395	1.21155	3.64641	6.03973	1.21398	2.42995	30.0569	37.6961	74.6784	9.52079
L1ME1	4.971	2.15891	3.13198	3.63505	9.58308	6.99456	14.0982	6.89208	3.69254	2.55902	10.2742	5.08276	3.16751	2.54913	3.22499	1.33738	1.90738	1.31141	1.31592	18.4505	31.6263	27.1787	23.1493

## Sheet: S8. qPCR primers
Gene	Forward primer	Reverse primer
TDRD9	GTTCCCAAGTGGCATGAAAA	GTTCTTCCCTCTGCTGCTCTC
TDRD1	TCGACATCTTGGAAGAGGAAGT	TTGTCCACTGGGTTTCAAGC
TDRD5	ATGAGCATGGAAAAGACTTCCAA	CCAGGTCCAATCTGTGCAAT
TDRD6	TTGGATCTAAATGTGTTGTGTGGT	TCCACGGTTAAATCTCCATCA
TDRD12	ACTACCCAGGTGGAAGCCA	CAAGCATAGTTCTTTGCAACAAGAT
MAEL	ATCCAGCTCACAGAGGCTCA	GAATCCTGAACTCCCAACCC
MYBL1	ATAAGCGGTTGGGAAATCGT	GCCCTCCTGTTCCACTTTTC
DAZL	TGCAAATCCTGAAACTCCAA	TTTGGACACACCAGTTCGAT
MOV10L	TTTTGGAACGGCTGATGTCT	GGGACCGGTAGTTCTTCACC
PLD6	ACCGACTGCGACTACATGG	CCAGTGATGAGCACCCTCT
TDRKH	ATCCCAGAGATGCCCATGTT	TCCAGAAGTGGTTAGGGTGC
HENMT1	AGGGAGACGGCAATTCAGTT	GAAGTATCACCACATCCCAGGT
RNF17	TGTGGACATGCTTTTTGTGAA	CAGCCATTGGGTAGTAGCGT
PIWIL1	GCAAAAGGTCACAGCAGACA	CCTCCCATCTTGCAGTTCAT
PIWIL2/PL2L60A	CAGGCAGAGGCCATGTATTT	CTCGGAACATGGAGACCAAA
DDX4	AAAGTGGATTTGCCTCTGGG	CTCCAAAACCACCCATTGTG
PIWIL4	ATGCTCACAAGCTGACCTT	TTCCTAGACATGAAAACTAAGC
POU5F1 (OCT3/4)	TGCAGCAGATCAGCCACAT	TAGTCGCTGCTTGATCGCTT
NANOG	GCTGAAGAATAGCAATGGTG	AGTCGGGTTCACCAGGCA
Full-length L1HS/L1PA2/L1PA3	CACCACGAGACTATATCCCACACCT	GCAGAGGTTACTGCTGTCTTTTTGTT
All Alu subfamilies	CAACATGGTGAAACCCCGTCTCT	GCCTCAGCCTCCCGAGTAG
AluYa5	ACCATCCCGGCTAAAACGGTGA	GCGATCTCGGCTCACTG
Supplementary table S8. qPCR primers used in the study.

## Sheet: S9.RNAseq,smallRNA-seq datasets
	Library name	Tissue	Type of sample	Run accession/reference	Number of high quality reads containing adapter
Datasets generated in this study	N1	Adult healthy testis	smallRNA-seq	SRR4896694	9897091
	GCNIS SE1	Carcinoma in situ containing testis tissues adjacent to seminoma	smallRNA-seq	SRR4896695	9720534
	GCNIS SE2	Carcinoma in situ containing testis tissues adjacent to seminoma	smallRNA-seq	SRR4896696	5356160
	GCNIS SE3	Carcinoma in situ containing testis tissues adjacent to seminoma	smallRNA-seq	SRR4896697	5045626
	GCNIS NS1	Carcinoma in situ containing testis tissues adjacent to nonseminoma	smallRNA-seq	SRR4896698	8380041
	GCNIS NS2	Carcinoma in situ containing testis tissues adjacent to nonseminoma	smallRNA-seq	SRR4896699	5889021
	GCNIS NS3	Carcinoma in situ containing testis tissues adjacent to nonseminoma	smallRNA-seq	SRR4896700	21864147
	SE1	Testicular germ cell tumor (seminoma)	smallRNA-seq	SRR4896701	10229650
	SE2	Testicular germ cell tumor (seminoma)	smallRNA-seq	SRR4896702	5134269
	SE3	Testicular germ cell tumor (seminoma)	smallRNA-seq	SRR4896706	5487902
	NS1	Testicular germ cell tumor (nonseminoma)	smallRNA-seq	SRR4896708	13702654
	NS2	Testicular germ cell tumor (nonseminoma)	smallRNA-seq	SRR4896729	6367048
	NS3	Testicular germ cell tumor (nonseminoma)	smallRNA-seq	SRR4896754	5267906
	TERA1 scRNA	TERA1 cell line after treatment with scRNA rep1	smallRNA-seq	SRR4896756	5586318
	TERA1 siRNA	TERA1 cell line after treatment with siRNA for PIWIL2 rep1	smallRNA-seq	SRR4896755	22972267
Publicly available datasets used in this study	na	Fetal testis (5 samples)	RNA-seq	Cell Rep, 13, 854-863	na
	na	Fetal testis (3 samples)	smallRNA-seq		23695135, 102007, 139020
	N2-N3	Adult healthy testis	smallRNA-seq		39256999, 2028231
	Adult brain	Adult brain	smallRNA-seq		3091051
	Fetal brain	Fetal brain	smallRNA-seq		1336491
	Fetal heart	Fetal heart	smallRNA-seq		770204
	Supplementary table S9. smallRNA-seq datasets generated in this study and publicly available RNA-seq and smallRNA-seq datasets used in this study.
